# Supplementary material for: Neuronal Nitric Oxide Synthase Is Dislocated in Type I Fibers of Myalgic Muscle but Can Recover with Physical Exercise Training
Source: Hindawi journal article supplement (doi:10.1155/2015/265278), 2015-01-01

Figure S1

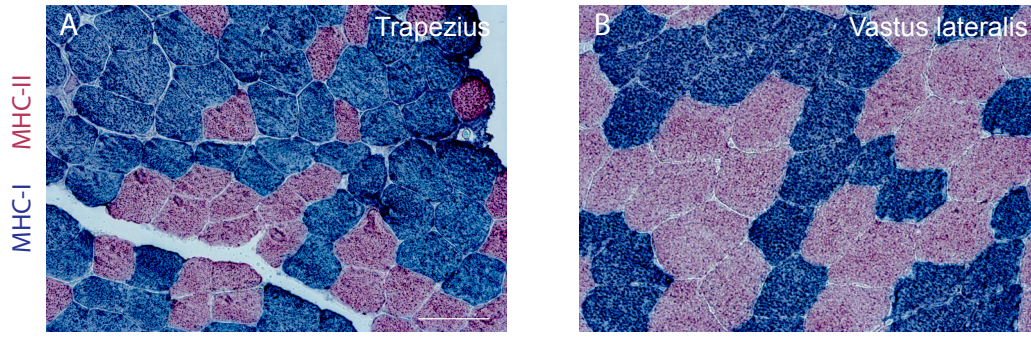

Supplement: f1 [file 265278.f1.pdf]
